# Supplementary material
Source: HighWire-hosted journal article supplement (https://www.cfp.ca/content/suppl/2024/03/07/70.3.161)
Supplement: Appendix_A_Environmental_Scan_Extended_Methods.pdf [file Appendix_A_Environmental_Scan_Extended_Methods.pdf]

# APPENDIX

## A: Environmental Scan Extended Methods

The environmental scan was completed by Mahzabeen Emu as part of her Mitacs Business Strategy Internship at the College of Family Physicians of Canada (CFPC), supervised by Drs. Jacqueline Kueper and Salimur Choudhury.

We searched for research at the intersection of artificial intelligence (AI) and family medicine (FM) in Canada that was published since two previous scoping reviews on AI for primary care research (2018+).

**Search Strategy:** The search strategy was developed iteratively in collaboration with the CFPC librarian Cheri Nickel. We searched three databases (Scopus, Medline, Global Health) with English-language and 2018+ publication year restrictions. We identified additional literature through web-searching and knowledge of the research team. Gray literature was also searched to identify AI for health reports from key organizations within Canada, and AI for FM or primary care reports from other countries with similar health care systems. Key words used to conduct the searches included artificial intelligence, machine learning, natural language processing, neural network, deep learning, reinforcement learning, primary health care, general practitioners or physicians, family/ or physicians, and primary care.

**Document Selection:** Studies eligible for inclusion were written in the English-language and exhibited relevance to FM and AI. ME screened the title, abstract, and full-text, and JK and SC resolved uncertainties. A large number of studies were excluded due to the lack of proper FM collaboration, not being pilot tested, because of utilizing ineligible data sources, or irrelevant to Canadian primary care. Duplicate studies were excluded manually.
