# Supplementary material
Source: HighWire-hosted journal article supplement (https://www.cfp.ca/content/suppl/2024/03/07/70.3.161)
Supplement: Appendix_D_Pre-Meeting_Survey.pdf [file Appendix_D_Pre-Meeting_Survey.pdf]

## D: Roundtable Participant Pre-Meeting Survey

Below are survey questions asked to participants in advance of the Roundtable, with summary results in graphical format. Brief biographies and optional contact e-mails were also collected to circulate to participants in advance of the meeting and to help facilitate contact afterwards.

**Q1. How would you describe your familiarity with family medicine and the nature of work that goes on in primary care? Please select the highest relevant category.**

n=26 responses

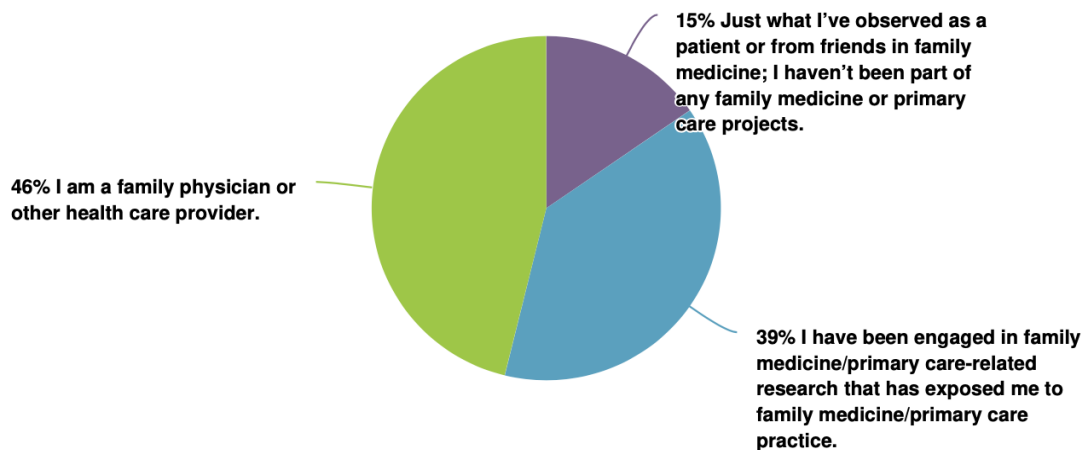

**Q2. What is your familiarity with artificial intelligence? Please select the highest relevant category.**

n=26 responses

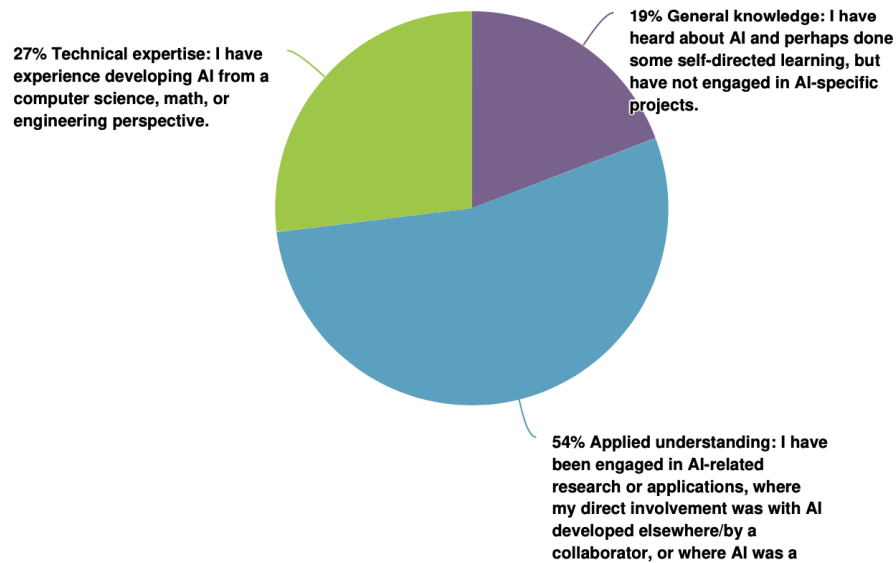

**Q3. Please click within the intersecting circles in the place that best represents where you would situate your own work to date in AI for health research or related initiatives.**

n=23 responses

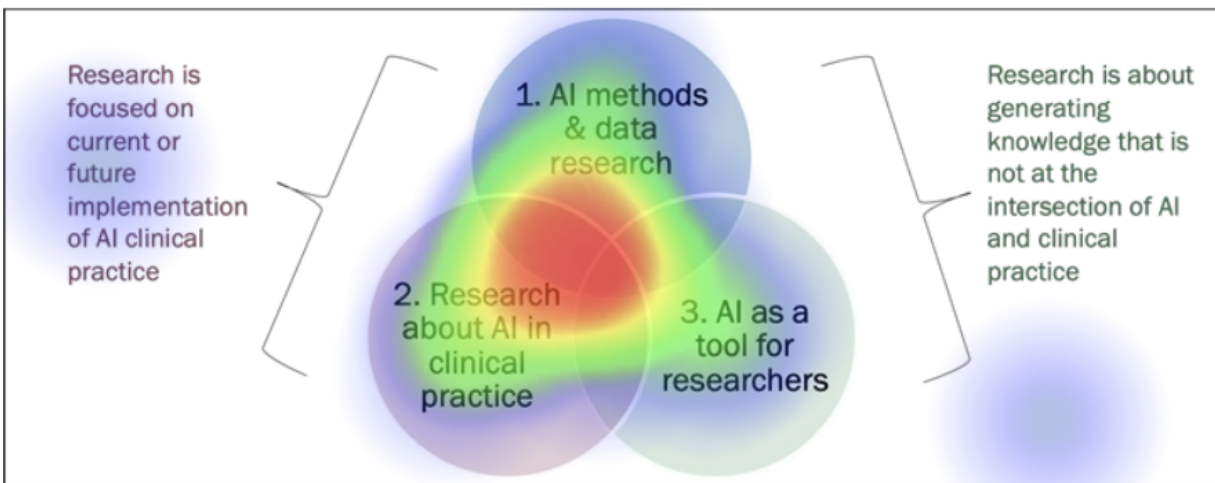

**Q4. Please place a dot within the intersecting circles in the place that best represents where you would situate your own work to date in AI for family medicine-specific research or related initiatives. If you do not have family medicine-specific experience, please leave this blank.**

n=19 responses

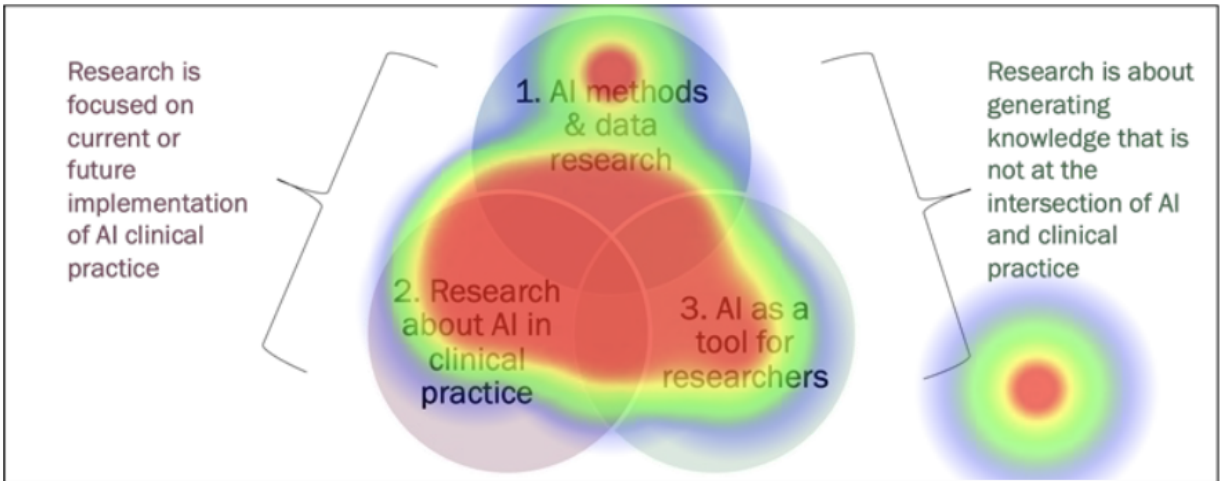

**Q5. Please place a dot within the intersecting circles that best represents your area of strongest interest in AI for family medicine- specific research. Your interest and experience might be the same.**

n=24 responses

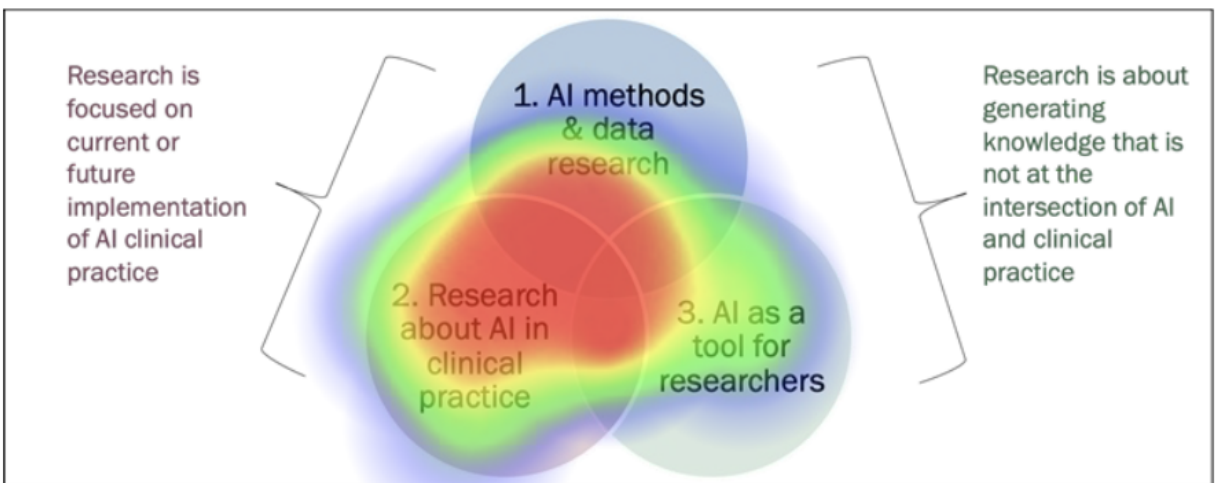

**Q6. What is one thing you hope to get out of our full day roundtable meeting with other AI and family medicine leaders?**

[free text responses; not shared publicly]

**Q7. How do you think AI for family medicine will move forward?**

[free text responses; not shared publicly]
